# Supplementary material for: Five Novel Non-Sialic Acid-Like Scaffolds Inhibit In Vitro H1N1 and H5N2 Neuraminidase Activity of Influenza a Virus
Source: MDPI journal article supplement (doi:10.3390/molecules25184248), 2020-09-16
Supplement: s1 [file s1]

## Supplementary Materials for Five Novel Non-Sialic Acid-Like Scaffolds Inhibit In Vitro H1N1 and H5N2 Neuraminidase Activity of Influenza A Virus

**Table S1.** Cytotoxicity of molecules on MDCK cells for 24 and 48 hours following the MTT colorimetric method.

| Molecule | 24 h                  | 48 h       |
|----------|-----------------------|------------|
|          | CC <sub>50</sub> (μM) |            |
| AAMOL    | 16.0 ± 1.5            | ND         |
| FMOL     | 0.11 ± 1.3            | 10.2 ± 1.4 |
| STL      | 1.41 ± 1.3            | 1.38 ± 1.3 |
| CIV      | 0.3 ± 1.2             | 0.55 ± 1.1 |
| ORP      | 6110 ± 1.1            | 1189 ± 1.3 |

ND: not determined.
